# Supplementary material for: ‘We are not going to shut down, because we cannot postpone pregnancy’: a mixed-methods study of the provision of maternal healthcare in six referral maternity wards in four sub-Saharan African countries during the COVID-19 pandemic
Source: HighWire-hosted journal article supplement (doi:10.1136/bmjgh-2021-008063), 2022-02-01
Supplement: bmjgh-2021-008063supp002_data_supplement.pdf [file bmjgh-2021-008063supp002_data_supplement.pdf]

**S2 Table - Sources of routine data in each referral hospital and indicator definitions**

| Country                                     | GUINEA                                                       |                                                     | NIGERIA                                               | TANZANIA                                                               | UGANDA                             |                                                  | Indicator definitions                                                                                                                                       |
|---------------------------------------------|--------------------------------------------------------------|-----------------------------------------------------|-------------------------------------------------------|------------------------------------------------------------------------|------------------------------------|--------------------------------------------------|-------------------------------------------------------------------------------------------------------------------------------------------------------------|
| Hospital name                               | Hôpital National Ignace Deen (Ignace Deen National Hospital) | Hôpital Regional de Mamou (Mamou Regional Hospital) | Lagos University Teaching Hospital                    | Muhimbili National Hospital                                            | Kawempe National Referral Hospital | Mulago Specialised Women's and Neonatal Hospital |                                                                                                                                                             |
| Abbreviation/Acronym                        | HNID                                                         | HRM                                                 | LUTH                                                  | MNH                                                                    | KNRH                               | MSWNH                                            |                                                                                                                                                             |
| Indicator / Sources                         |                                                              |                                                     |                                                       |                                                                        |                                    |                                                  |                                                                                                                                                             |
| Deliveries                                  | SNIS report; Labour ward register                            | SNIS report; Labour ward register                   | Labour ward register; Labour ward theatre register    | Labour ward MRF                                                        | HMIS; Maternity ward register      | Delivery book                                    | Total number of deliveries per month (vaginal and abdominal); does not include births before arrival; deliveries of multiple pregnancies are counted as one |
| Caesarean sections                          | SNIS report; Theatre register                                | SNIS report; Theatre register                       | Labour ward theatre register                          | Theatre MRF; Labour ward MRF                                           | HMIS; Theatre register             | Theatre register                                 | Total number of caesarean sections per month (elective and emergency). Also presented as a percentage out of the total number of deliveries                 |
| Labour inductions                           | SNIS report; Labour ward register                            | SNIS report; Labour ward register                   | Labour ward register; Patient records (nurses' notes) | Labour ward book notes; Electronic medical record since September 2020 | Maternity ward register            | Maternity ward register                          | Total number of labour inductions per month. Also presented as a percentage out of the total number of deliveries                                           |
| <b>Total number of sources per facility</b> | 3                                                            | 3                                                   | 3                                                     | 4                                                                      | 3                                  | 3                                                |                                                                                                                                                             |

**Abbreviations:** Health Management Information System (HMIS); Monthly report form (MRF); Système National d'Information Sanitaire (SNIS - National Health Information System)
